# Supplementary material
Source: publisher site journal article supplement (https://www.dovepress.com/article/333545)
Supplement: Supplementary file 1 [file get_supplementary_file.php]

## Annex – I: Search strategy

**Table 1: Search strategy on MEDLINE, PubMed platform**

| Search number | Query                                      | Sort By     | Filters                          | Search Details                                                                                                                                                                                                                                                                                                                                                                                                                                                                                                                                                                                                                                                                                                                                                                                                                                                                                                | Result | Time     |
|---------------|--------------------------------------------|-------------|----------------------------------|---------------------------------------------------------------------------------------------------------------------------------------------------------------------------------------------------------------------------------------------------------------------------------------------------------------------------------------------------------------------------------------------------------------------------------------------------------------------------------------------------------------------------------------------------------------------------------------------------------------------------------------------------------------------------------------------------------------------------------------------------------------------------------------------------------------------------------------------------------------------------------------------------------------|--------|----------|
| #1            | (COVID-19)<br>AND (Ethiopia)               | Most Recent | from<br>2020/1/1 -<br>2020/10/10 | ((("covid 19"[All Fields] OR "covid 19"[MeSH Terms] OR "covid 19 vaccines"[All Fields] OR "covid 19 vaccines"[MeSH Terms] OR "covid 19 serotherapy"[All Fields] OR "covid 19 serotherapy"[Supplementary Concept] OR "covid 19 nucleic acid testing"[All Fields] OR "covid 19 nucleic acid testing"[MeSH Terms] OR "covid 19 serological testing"[All Fields] OR "covid 19 serological testing"[MeSH Terms] OR "covid 19 testing"[All Fields] OR "covid 19 testing"[MeSH Terms] OR "sars cov 2"[All Fields] OR "sars cov 2"[MeSH Terms] OR "severe acute respiratory syndrome coronavirus 2"[All Fields] OR "ncov"[All Fields] OR "2019 ncov"[All Fields] OR ("coronavirus"[MeSH Terms] OR "coronavirus"[All Fields] OR "cov"[All Fields]) AND 2019/11/01:3000/12/31[Date - Publication])) AND ("ethiopia"[MeSH Terms] OR "ethiopia"[All Fields] OR "ethiopia s"[All Fields])) AND (2020/1/1:2020/10/10[pdat]) | 115    | 10:17:45 |
| #2            | (SARS-CoV-2)<br>AND (Ethiopia)             | Most Recent | from<br>2020/1/1 -<br>2020/10/10 | ((("sars cov 2"[MeSH Terms] OR "sars cov 2"[All Fields] OR "sars cov 2"[All Fields]) AND ("ethiopia"[MeSH Terms] OR "ethiopia"[All Fields] OR "ethiopia s"[All Fields])) AND (2020/1/1:2020/10/10[pdat])                                                                                                                                                                                                                                                                                                                                                                                                                                                                                                                                                                                                                                                                                                      | 87     | 10:19:28 |
| #3            | (2019 novel coronavirus)<br>AND (Ethiopia) | Most Recent | from<br>2020/1/1 -<br>2020/10/10 | ((("sars cov 2"[MeSH Terms] OR "sars cov 2"[All Fields] OR "2019 novel coronavirus"[All Fields]) AND ("ethiopia"[MeSH Terms] OR "ethiopia"[All Fields] OR "ethiopia s"[All Fields])) AND (2020/1/1:2020/10/10[pdat])                                                                                                                                                                                                                                                                                                                                                                                                                                                                                                                                                                                                                                                                                          | 88     | 10:20:13 |
| #4            | (2019-nCoV)<br>AND (Ethiopia)              | Most Recent | from<br>2020/1/1 -<br>2020/10/10 | ((("sars cov 2"[MeSH Terms] OR "sars cov 2"[All Fields] OR "2019 ncov"[All Fields]) AND ("ethiopia"[MeSH Terms] OR "ethiopia"[All Fields] OR "ethiopia s"[All Fields])) AND (2020/1/1:2020/10/10[pdat])                                                                                                                                                                                                                                                                                                                                                                                                                                                                                                                                                                                                                                                                                                       | 87     | 10:20:56 |
| #5            | (Novel coronavirus)<br>AND (Ethiopia)      | Most Recent | from<br>2020/1/1 -<br>2020/10/10 | ((("sars cov 2"[MeSH Terms] OR "sars cov 2"[All Fields] OR ("novel"[All Fields] AND "coronavirus"[All Fields]) OR "novel coronavirus"[All Fields]) AND ("ethiopia"[MeSH Terms] OR "ethiopia"[All Fields] OR "ethiopia s"[All Fields])) AND (2020/1/1:2020/10/10[pdat])                                                                                                                                                                                                                                                                                                                                                                                                                                                                                                                                                                                                                                        | 97     | 10:21:36 |

**Table 2: Search strategy for grey literatures**

| <b>Databases</b>       | <b>Search terms</b>                                                                                         | <b>Number of articles</b> |
|------------------------|-------------------------------------------------------------------------------------------------------------|---------------------------|
| <b>Google scholar</b>  | “COVID-19” OR “SARS-CoV-2” OR “2019 novel coronavirus” OR “2019-nCoV” OR “novel coronavirus” AND “Ethiopia” | 287                       |
| <b>Other databases</b> |                                                                                                             | 132                       |

## Annex – II: Summary Table of included articles

| A. Knowledge, Attitude, and Practice towards COVID-19 in Ethiopia                                                                                                                                                                                                            |                                       |                                                                |                                         |             |                            |                      |                                                                                                                                                                                                                                              |
|------------------------------------------------------------------------------------------------------------------------------------------------------------------------------------------------------------------------------------------------------------------------------|---------------------------------------|----------------------------------------------------------------|-----------------------------------------|-------------|----------------------------|----------------------|----------------------------------------------------------------------------------------------------------------------------------------------------------------------------------------------------------------------------------------------|
| Author (year). Title                                                                                                                                                                                                                                                         | Source/ Journal                       | Aims                                                           | Design                                  | Sample size | Participant                | Study period         | Key findings                                                                                                                                                                                                                                 |
| 1. <b>Feleke</b> DG et al. (2020). Assessment of Knowledge, Attitude and Associated Factors toward COVID-19 among Nurses Who Work in South Gondar Zone, Hospitals, Northwest Ethiopia: Institution-based cross-sectional Study                                               | <i>Preprint</i>                       | Knowledge and attitude about COVID-19                          | Institution-based cross-sectional study | 166         | Healthcare workers(nurse)  | June 1st - 30/2020.  | <ul style="list-style-type: none"> <li>- 84.9 % had good knowledge about COVID-19</li> <li>- 63.3% favorable attitude towards prevention methods</li> </ul>                                                                                  |
| 2. <b>Emiru</b> TD et al. (2020). Assessment of Knowledge, Practice and Associated Factors Towards Prevention of Novel Corona Virus among Clients Attending at Debre Tabor General Hospital Debre Tabor Town, North West Ethiopia: Institutional Based Cross-Sectional Study | <i>Preprint</i>                       | Knowledge and practice about COVID-19 prevention               | Institution-based cross-sectional study | 345         | Patients visiting hospital | May 15 to 30, 2020   | <ul style="list-style-type: none"> <li>- 54.2% had good knowledge about COVID-19 prevention methods</li> <li>- 49.0% good practice on COVID 19 preventions</li> </ul>                                                                        |
| 3. <b>Aynalem</b> YA et al. (2020). Assessment of undergraduate student knowledge, practices, and attitude towards COVID-19 in Debre Berhan University, Ethiopia                                                                                                             | <i>Preprint</i>                       | Knowledge, attitude, and practice about COVID-19               | Cross-sectional study                   | 546         | College students           | March 18–24, 2020    | <ul style="list-style-type: none"> <li>- 73.8% had good knowledge</li> <li>- 75% had favorable attitude</li> <li>- 91.4% avoided crowded place</li> <li>- 52% practiced cough etiquette</li> <li>- 44% maintain social distancing</li> </ul> |
| 4. <b>Gelaw</b> AB et al. (2020). Assessment on awareness towards preventive measures of COVID-19 in Sheka, Ethiopia: Community based cross-sectional Study                                                                                                                  | <i>Preprint</i>                       | Awareness status towards COVID-19                              | Community-based cross-sectional study   | 419         | Community                  | April 10 to 21, 2020 | <ul style="list-style-type: none"> <li>- 49.4 % had awareness about COVID-19</li> </ul>                                                                                                                                                      |
| 5. <b>Abebe</b> A et al. (2020). Awareness of Health Professionals on COVID-19 and Factors Affecting It Before and During Index Case in North Shoa Zone, Ethiopia                                                                                                            | <i>Infect Drug Resist. Dove press</i> | Awareness on clinical and epidemiological spectrum of COVID-19 | Facility-based cross-sectional study    | 384         | Healthcare workers         | March 7–16/2020      | <ul style="list-style-type: none"> <li>- 79.4% had awareness about COVID-19</li> <li>- Type of profession, level of training, owning TV at home, and prior information about other</li> </ul>                                                |

|                                                                                                                                                                                                                                 |                                                        |                                                                                            |                                                                    |      |                    |                          |                                                                                                                                                                                                                                                                                                                                              |
|---------------------------------------------------------------------------------------------------------------------------------------------------------------------------------------------------------------------------------|--------------------------------------------------------|--------------------------------------------------------------------------------------------|--------------------------------------------------------------------|------|--------------------|--------------------------|----------------------------------------------------------------------------------------------------------------------------------------------------------------------------------------------------------------------------------------------------------------------------------------------------------------------------------------------|
|                                                                                                                                                                                                                                 |                                                        | and factors affecting it                                                                   |                                                                    |      |                    |                          | panemics were important factors                                                                                                                                                                                                                                                                                                              |
| 6. <b>Mechessa DF et al. (2020).</b> Community's Knowledge of COVID-19 and Its Associated Factors in Mizan-Aman Town, Southwest Ethiopia                                                                                        | <i>Internati onal Journal of Gen. Med., Dove press</i> | Knowledge about COVID-19 and associated factors                                            | Community-based cross-sectional study                              | 423  | Community          | April 14 to May 14, 2020 | <ul style="list-style-type: none"> <li>- 64.6% of the participants had good knowledge</li> <li>- Overall correct rate of the knowledge questionnaire was 74.75%</li> <li>- Age, sex, occupation, and educational status were important factors</li> </ul>                                                                                    |
| 7. <b>Hailu W et al. (2020).</b> Compliance, Barriers, and Facilitators to Social Distancing Measures for Prevention of COVID-19 in Northwest Ethiopia                                                                          | <i>Pre-print</i>                                       | Factor affecting compliance to social distancing measures for the prevention of COVID-19   | Phone interview based cross-sectional survey and qualitative study | 401  | Healthcare workers | April 20 to May 20, 2020 | <ul style="list-style-type: none"> <li>- 60.6% knowledge on COVID-19 transmission</li> <li>- 76.31% had good knowledge on COVID-19 prevention</li> <li>- 55.36 % had poor compliance to social distancing measures</li> <li>- 63.84% went to crowded places without putting face mask</li> <li>- Age was an important factor</li> </ul>      |
| 8. <b>Tsegaye D et al. (2020).</b> Knowledge and preventive practices towards Covid-19 and associated factors among healthcare workers in selected health facilities of Illu Aba Bor and Buno Bedelle Zones, Southwest Ethiopia | <i>Pre-print</i>                                       | Knowledge and preventive practices towards Covid-19                                        | Institution-based cross-sectional study                            | 330  | Healthcare workers | April to May 2020        | <ul style="list-style-type: none"> <li>- 93.3% of the respondent demonstrated good knowledge towards COVID-19</li> <li>- 64.2% had good infection prevention practices</li> </ul>                                                                                                                                                            |
| 9. <b>Aweke Z et al. (2020).</b> Knowledge of COVID-19 and its prevention among residents of the Gedeo zone, South Ethiopia: Sources of information as a factor                                                                 | <i>Curr Med Res Opin</i>                               | Knowledge level about COVID-19 & its prevention and association with source of information | Community-based cross-sectional study                              | 1170 | Community          | March 01 to 30, 2020     | <ul style="list-style-type: none"> <li>- 60.5% had a good level of knowledge about COVID-19 and its prevention techniques</li> <li>- 95.6% had information about COVID-19 and its prevention techniques</li> <li>- Those who had internet, television/radio, and health workers as their information sources had better knowledge</li> </ul> |

|                                                                                                                                                                                    |                                                  |                                                                        |                                                     |     |                            |                                                 |                                                                                                                                                                                                                                                                                                                                                                                                                                                                      |
|------------------------------------------------------------------------------------------------------------------------------------------------------------------------------------|--------------------------------------------------|------------------------------------------------------------------------|-----------------------------------------------------|-----|----------------------------|-------------------------------------------------|----------------------------------------------------------------------------------------------------------------------------------------------------------------------------------------------------------------------------------------------------------------------------------------------------------------------------------------------------------------------------------------------------------------------------------------------------------------------|
|                                                                                                                                                                                    |                                                  |                                                                        |                                                     |     |                            |                                                 | about COVID-19 and its prevention.                                                                                                                                                                                                                                                                                                                                                                                                                                   |
| 10. <b>Jamie</b> AH et al. (2020). Knowledge, Attitude and Practice of Healthcare Workers towards Novel Corona Virus (COVID-19) in Jugal Hospital, Harari Regional State, Ethiopia | <i>EC Nursing and Healthcare</i>                 | Knowledge, attitude, practice towards COVID-19                         | Institution-based cross-sectional study             | 207 | Healthcare workers         | February to March 2020                          | <ul style="list-style-type: none"> <li>- 100% have heard about COVID-19</li> <li>- 100% knew common symptoms</li> <li>- 100% agreed that cases should be reported to officials.</li> <li>- 97.10% were not ready to give care for COVID-19 patient</li> <li>- 100% reported washing hand with soap and water</li> <li>- Only 3.38% answered that there is enough soap and water to wash hand, hand sanitizers and personal protective equipment materials</li> </ul> |
| 11. <b>Jemal</b> B et al. (2020). Knowledge, attitude and practice of healthcare workers towards COVID-19 and its prevention in Ethiopia: a multicenter study                      | <i>Preprint</i>                                  | Knowledge, attitude, and practices towards COVID-19 and its prevention | Institution-based multicenter cross-sectional study | 397 | Healthcare workers         | <i>Not mentioned ; probably before May 2020</i> | <ul style="list-style-type: none"> <li>- 88.2% had good knowledge</li> <li>- 94.7% had positive attitude</li> <li>- 63.5% of participants had good practice towards COVID-19 and its prevention.</li> </ul>                                                                                                                                                                                                                                                          |
| 12. <b>Akalu</b> Y et al. (2020). Knowledge, Attitude and Practice towards COVID-19 among Chronic Disease Patients at Addis Zemen Hospital, Northwest Ethiopia.                    | <i>Infection and Drug Resistance, Dove press</i> | Knowledge, attitude, and practice towards COVID-19                     | Institution-based cross-sectional study             | 404 | Patients visiting hospital | March 02 to April 10, 2020                      | <ul style="list-style-type: none"> <li>- 99.2% have heard about COVID-19</li> <li>- 66.1% had good knowledge</li> <li>- 52.7% had good practice</li> </ul>                                                                                                                                                                                                                                                                                                           |
| 13. <b>Nigussie</b> TF et al. (2020). Knowledge, attitude and practice towards COVID-19 infection in Arba Minch town, Southern Ethiopia.                                           | <i>Global scientific journal</i>                 | Knowledge, attitude and practice towards COVID-19                      | Community based cross-sectional                     | 528 | Community                  | March 08 to April 08, 2020                      | <ul style="list-style-type: none"> <li>- 76.53% had good knowledge</li> <li>- 66.5% had good Practice for COVID-19 prevention</li> <li>- 21.2% opposed the wearing of face masks</li> </ul>                                                                                                                                                                                                                                                                          |
| 14. <b>Tadesse</b> AW et al. (2020). Knowledge, Attitude, and Practice and Associated Factors towards COVID-19 among College Students                                              | <i>Preprint</i>                                  | Knowledge, attitude, & practice of COVID-19                            | Community-based cross-sectional study               | 408 | College students           | April 15-25, 2020                               | <ul style="list-style-type: none"> <li>- 69.6% had good knowledge</li> <li>- 56.6% had positive attitude</li> <li>- 65% had good practice</li> <li>- Age, family size, marital status,</li> </ul>                                                                                                                                                                                                                                                                    |

|                                                                                                                                                                                               |                 |                                                                           |                                       |      |                              |                      |                                                                                                                                                                                                                                                                                                                                                                                                                                                                                                                                                                                                                                                 |
|-----------------------------------------------------------------------------------------------------------------------------------------------------------------------------------------------|-----------------|---------------------------------------------------------------------------|---------------------------------------|------|------------------------------|----------------------|-------------------------------------------------------------------------------------------------------------------------------------------------------------------------------------------------------------------------------------------------------------------------------------------------------------------------------------------------------------------------------------------------------------------------------------------------------------------------------------------------------------------------------------------------------------------------------------------------------------------------------------------------|
| in Amhara Region, Ethiopia; A Cross-Sectional Study                                                                                                                                           |                 | prevention and associated factors                                         |                                       |      |                              |                      | and residency were important predictors                                                                                                                                                                                                                                                                                                                                                                                                                                                                                                                                                                                                         |
| 15. <b>Tadesse DB et al. (2020).</b> Knowledge, Attitude, Practice and Psychological response toward COVID-19 among Nurses during the COVID-19 outbreak in Northern Ethiopia                  | <i>Preprint</i> | Knowledge, attitude, practice, and psychological response toward COVID-19 | Hospital-based cross-sectional study  | 415  | Healthcare workers (nurses)  | March to April 2020  | <ul style="list-style-type: none"> <li>- 74% had good knowledge</li> <li>- 67% good infection prevention practice</li> <li>- 72% favorable attitude</li> <li>- 85.3% disturbed psychological response towards COVID-19</li> </ul>                                                                                                                                                                                                                                                                                                                                                                                                               |
| 16. <b>Kebede Y et al. (2020).</b> Knowledge, perceptions and preventive practices towards COVID-19 early in the outbreak among Jimma University Medical Center visitors, Southwest Ethiopia. | <i>PLOS ONE</i> | Knowledge, perceptions, and practices                                     | Hospital-based cross-sectional study  | 247  | Patients visiting hospital   | March 22–28, 2020    | <ul style="list-style-type: none"> <li>- 41.3% had overall high knowledge; 83.0% knew the main clinical symptoms of COVID-19; 72.0% knew risk factors for severe disease; 95.1% knew that the virus spreads via respiratory droplets; 31.2% knew about the possibility of asymptomatic transmission; 6.1% knew that children and young adults had to involve in the preventive measures</li> <li>- 68.8% felt self-efficacious to controlling COVID-19</li> <li>- 83.3% believed that COVID-19 is a stigmatized disease</li> <li>- 77.3% were practicing frequent hand washing</li> <li>- 53.8% practiced avoidance of shaking hands</li> </ul> |
| 17. <b>Defar A et al. (2020).</b> Knowledge, Practice and associated factors towards the Prevention of COVID-19 among high-risk groups: A cross-sectional study in Addis Ababa, Ethiopia      | <i>Preprint</i> | Knowledge and practices of COVID-19 prevention and associated factors     | Community based cross-sectional study | 6007 | Community (High-risk groups) | 14 to 30 April, 2020 | <ul style="list-style-type: none"> <li>- 52% had good knowledge about transmission of COVID-19</li> <li>- 60% had good knowledge about prevention</li> <li>- 80% practiced hand washing</li> <li>- 76% practiced social distancing</li> <li>- 49% had poor practices of the</li> </ul>                                                                                                                                                                                                                                                                                                                                                          |

|                                                                                                                                                                                                                                    |                                                    |                                                                             |                                                   |      |                    |                               |                                                                                                                                                                                                                                                                                                                                                                                                                                                                     |
|------------------------------------------------------------------------------------------------------------------------------------------------------------------------------------------------------------------------------------|----------------------------------------------------|-----------------------------------------------------------------------------|---------------------------------------------------|------|--------------------|-------------------------------|---------------------------------------------------------------------------------------------------------------------------------------------------------------------------------------------------------------------------------------------------------------------------------------------------------------------------------------------------------------------------------------------------------------------------------------------------------------------|
|                                                                                                                                                                                                                                    |                                                    |                                                                             |                                                   |      |                    |                               | precautionary measures against COVID-19                                                                                                                                                                                                                                                                                                                                                                                                                             |
| 18. <b>Jamie</b> AH et al. (2020). Hand Washing Practices among Health Care Workers in Jugal Hospital, Harar, Ethiopia, 2020: In the Era of Corona Virus: Observational Study                                                      | <i>Journal of Antivirals &amp; Antiretrovirals</i> | Hand hygiene practices                                                      | Institutional cross sectional observational study | 166  | Healthcare workers | February to March 2020        | <ul style="list-style-type: none"> <li>- 59.64% use soap bar</li> <li>- 34.34% use only water</li> <li>- 6.02% use alcohol based sanitizer</li> <li>- 4.22% washed hands b/n patients</li> <li>- Only 16.27% followed correct sequence in hand washing</li> </ul>                                                                                                                                                                                                   |
| 19. <b>Mersha</b> A et al. (2020). Health professionals' practice and associated factors towards precautionary measures for COVID-19 pandemic in public health facilities of Gamo zone, southern Ethiopia: a cross-sectional study | <i>Preprint</i>                                    | Practice towards precautionary measures for COVID-19 and associated factors | Cross-sectional study                             | 428  | Healthcare workers | June 10-19, 2020              | <ul style="list-style-type: none"> <li>- 67% had good knowledge</li> <li>- 50.5% had positive attitude</li> <li>- 35.3% good practice on precautionary measures</li> <li>- Marital status, good knowledge and attitude about COVID-19 important factors.</li> </ul>                                                                                                                                                                                                 |
| 20. <b>Asemahagn</b> MA. (2020). Factors determining the knowledge and prevention practice of healthcare workers towards COVID-19 in Amhara region, Ethiopia: a cross-sectional survey                                             | <i>Tropical Medicine and Health, BMC</i>           | Factors determining the knowledge and prevention towards COVID-19           | Cross-sectional online survey                     | 398  | Healthcare workers | April and May 2020            | <ul style="list-style-type: none"> <li>- 70% had good knowledge about COVID-19</li> <li>- 62% had good prevention practices</li> <li>- Age &lt; 34 years, access to infection prevention (IP), presence of IP guideline, using social media were found to be enabling factors for knowledge</li> <li>- Access to IP training, presence of IP guidelines, knowledge about COVID-19, having chronic illnesses were enabling factors to practice prevention</li> </ul> |
| 21. <b>Negera</b> E et al. (2020). Inadequate level of knowledge, mixed outlook and poor adherence to COVID-19 prevention guideline among Ethiopians                                                                               | <i>Preprint</i>                                    | Knowledge, attitude, and practice toward COVID-19                           | Cross-sectional study design; telephone interview | 1570 | Community          | May 20, 2020 to June 20, 2020 | <ul style="list-style-type: none"> <li>- 42% had good knowledge</li> <li>- 53.8% favorable attitude</li> <li>- 24.3% good practice</li> </ul>                                                                                                                                                                                                                                                                                                                       |
| 22. <b>Kassie</b> BA et al. (2020). Knowledge and attitude towards COVID-19 and associated factors among health care                                                                                                               | <i>PLOS ONE</i>                                    | Knowledge and attitude towards                                              | Institution-based cross-sectional                 | 408  | Healthcare workers | Mid of March to the end of    | <ul style="list-style-type: none"> <li>- 73.8% good Knowledge</li> <li>- 65.7% favorable attitude towards COVID-19</li> </ul>                                                                                                                                                                                                                                                                                                                                       |

|                                                                                                                                                                                                                                              |                                                          |                                                                              |                                       |     |                    |                       |                                                                                                                                                                                                                                                                                                                                                                                                                    |
|----------------------------------------------------------------------------------------------------------------------------------------------------------------------------------------------------------------------------------------------|----------------------------------------------------------|------------------------------------------------------------------------------|---------------------------------------|-----|--------------------|-----------------------|--------------------------------------------------------------------------------------------------------------------------------------------------------------------------------------------------------------------------------------------------------------------------------------------------------------------------------------------------------------------------------------------------------------------|
| providers in Northwest Ethiopia.                                                                                                                                                                                                             |                                                          | COVID-19, and associated factors                                             | study                                 |     |                    | April 2020            | - Level education was associated with good knowledge and favorable attitude                                                                                                                                                                                                                                                                                                                                        |
| 23. <b>Ayele AD et al. (2020).</b> Knowledge and Practice to Prevent Against Corona Virus Disease (COVID-19) and Its Associated Factors Among Pregnant Women in Debre Tabor Town Northwest Ethiopia: a Community Based Cross-Sectional Study | <i>Preprint</i>                                          | Knowledge and practice of preventive measures against COVID-19               | Community based cross-sectional study | 422 | Pregnant women     | May 25- June 15, 2020 | - 46.8% were knowledgeable<br>- 47.6 % had good practice against corona virus<br>- Age15-24, educational status, being civil servant, and ANC follow-up were associated with good knowledge                                                                                                                                                                                                                        |
| 24. <b>Girma S et al. (2020).</b> Knowledge and Precautionary Behavioral Practice Toward COVID-19 Among Health Professionals Working in Public University Hospitals in Ethiopia: A Web-Based Survey.                                         | <i>Risk Management and Healthcare Policy, Dove press</i> | Knowledge and precautionary behavior practice for COVID-19                   | Web-based online survey               | 273 | Healthcare workers | May 1 to 14, 2020     | - 100% Knowledge about prevention<br>- Almost all recommended protective measures practiced to the highest level<br>- There is gap in wearing mask and gloves                                                                                                                                                                                                                                                      |
| 25. <b>Mola S et al. (2020).</b> Magnitude and associated factors for attitude and practice of Southern Ethiopian residents toward COVID-19 and its preventions: A community based cross sectional study                                     | <i>Preprint</i>                                          | Attitude, practice and associated factors toward COVID-19 and its prevention | Community based cross sectional study | 585 | Community          | March 27 to 31, 2020  | - 90.3% had favorable attitude toward COVID-19 and its prevention<br>- 80% have bad practice toward covid-19 prevention<br>- 93.3% never used surgical mask<br>- only 10% of participants were practicing social distancing<br>- Age 18-44.9 years, having chronic medical illness, use of television as a source of information, and having good knowledge about COVID-19 were associated with favorable attitude |
| 26. <b>Dires A et al. (2020).</b> Perceived Efficacy of COVID-19 Prevention                                                                                                                                                                  | <i>Preprint</i>                                          | Perceived efficacy of                                                        | Institutional based cross             | 413 | Patients visiting  | 21 July - 5 August,   | - 42.1% of participants had low perception to the efficacy of                                                                                                                                                                                                                                                                                                                                                      |



|                                                                                                                                                                                                |                 |                                                                                         |                                       |     |                                 |                           |                                                                                                                                                                                                                                                                                                                                                                                                                                                |
|------------------------------------------------------------------------------------------------------------------------------------------------------------------------------------------------|-----------------|-----------------------------------------------------------------------------------------|---------------------------------------|-----|---------------------------------|---------------------------|------------------------------------------------------------------------------------------------------------------------------------------------------------------------------------------------------------------------------------------------------------------------------------------------------------------------------------------------------------------------------------------------------------------------------------------------|
| Measures and Intention to Use Among Chronic Disease Patients in Northeast Ethiopia, 2020                                                                                                       |                 | COVID-19 preventive measures and intention to carry out them                            | sectional                             |     | hospital                        | 2020                      | <ul style="list-style-type: none"> <li>- COVID-19 prevention measures</li> <li>- 28.3% had low intention to carry out those prevention measures.</li> <li>- Young age, male gender, uneducated, and face mask non-users were significantly associated with low perceived efficacy of COVID-19 prevention methods.</li> </ul>                                                                                                                   |
| 27. <b>Wondimu W et al. (2020).</b> Practice of Coronavirus Disease-19 Prevention Methods and Associated Factors in Three Zones of Southwest Ethiopia: Community based cross-sectional study   | <i>Preprint</i> | COVID-19 prevention practices                                                           | Community-based cross-sectional study | 803 | Community                       | May 1 to 31, 2020         | <ul style="list-style-type: none"> <li>- 59.4% of study participants had a good practice of COVID-19 prevention</li> <li>- 64.7% had a history of going to crowded places</li> <li>- Only 30.3% of the participants had a history of wearing a mask when leaving home</li> <li>- Urban residence, good knowledge, positive attitude, intention to seek care, and perceived mortality were positively associated with good practice.</li> </ul> |
| 28. <b>Dagne H et al. (2020).</b> Prevention Practice and Associated Factors of Coronavirus disease 2019 (COVID-19) Outbreak among Educated Ethiopians: An online Based Cross-sectional Survey | <i>Preprint</i> | Self-reported measures of prevention practice and associated factors regarding COVID-19 | Online based cross-sectional study    | 528 | Community (Educated Ethiopians) | March 25 to April 4, 2020 | <ul style="list-style-type: none"> <li>- 55.9% had good knowledge about COVID-19</li> <li>- 55.3% had good knowledge regarding symptoms</li> <li>- 57.8% had good knowledge about prevention methods of COVID-19</li> <li>- 54% had good COVID-19 preventive practice.</li> <li>- Being female, older age, knowledge about symptoms and prevention methods were associated with preventive practices</li> </ul>                                |
| 29. <b>Girma S et al. (2020).</b> Risk perception and precautionary health                                                                                                                     | <i>PLOS ONE</i> | Risk perception and                                                                     | Web-based cross-                      | 273 | Healthcare workers              | May 1–14, 2020            | <ul style="list-style-type: none"> <li>- Mean score of perceived vulnerability of COVID-19 was</li> </ul>                                                                                                                                                                                                                                                                                                                                      |

|                                                                                                                                                          |                 |                                                                           |                                        |      |                    |                     |                                                                                                                                                                                                                      |
|----------------------------------------------------------------------------------------------------------------------------------------------------------|-----------------|---------------------------------------------------------------------------|----------------------------------------|------|--------------------|---------------------|----------------------------------------------------------------------------------------------------------------------------------------------------------------------------------------------------------------------|
| behavior toward COVID-19 among health professionals working in selected public university hospitals in Ethiopia                                          |                 | precautionary health behavior toward COVID-19                             | sectional survey                       |      |                    |                     | higher than some of the prevalent infectious disease in the area<br>- Most participants applied recommended protective measures to the acceptable level, except for wearing masks and gloves.                        |
| 30. <b>Deressa W et al. (2020).</b> Risk perceptions and preventive practices of COVID-19 among healthcare professionals in public hospitals in Ethiopia | <i>Preprint</i> | Level of risk perception and practices of preventive measures of COVID-19 | A hospital-based cross-sectional study | 1134 | Healthcare workers | June 09 to 26, 2020 | - 88% were worried about the risk of becoming infected with coronavirus<br>- 91% worried about the risk of infection to their family.<br>- High rate of self-reported preventive practices and higher perceived risk |

#### B. Disease epidemiology and clinical spectrum of COVID-19 in Ethiopia

| Author (year). Title                                                                                                                                            | Source/ Journal                                             | Aims                                                               | Design                                                                  | Sample size | Participant           | Study period                    | Key findings                                                                                                                                                                                                                                                                                                                                                                                                                                                                                                            |
|-----------------------------------------------------------------------------------------------------------------------------------------------------------------|-------------------------------------------------------------|--------------------------------------------------------------------|-------------------------------------------------------------------------|-------------|-----------------------|---------------------------------|-------------------------------------------------------------------------------------------------------------------------------------------------------------------------------------------------------------------------------------------------------------------------------------------------------------------------------------------------------------------------------------------------------------------------------------------------------------------------------------------------------------------------|
| 1. <b>Oladeji O et al. (2020).</b> Application of Call Centre as COVID 19 Alert and Surveillance System in Pastoralist Communities of Somali Region of Ethiopia | <i>Journal of Advances in Medicine and Medical Research</i> | Effectiveness of the toll-free call center for surveillance system | Retrospective chart review of COVID 19 alerts and surveillance database | 414         | COVID-19 alert system | March 13, 2020 to June 30, 2020 | <b>414 alerts were reported during the study period</b><br>- 62.5% were from the toll-free call center:<br>o 49.3% o met the criteria as suspected cases<br>o 8.5% confirmed positive for COVID<br>- 37.5% alerts from the health facilities:<br>o 50.7% met the criteria as suspected cases<br>o 27.7% confirmed positive<br>- The call center is an effective system with wide coverage for monitoring alerts and can be explored as a long-term surveillance system during disease outbreaks and other public health |

|                                                                                                                                            |                                                               |                                                                                          |                                                                                        |      |                                           |                                  |                                                                                                                                                                                                                                                                                                                                                                                                                                                                                                         |
|--------------------------------------------------------------------------------------------------------------------------------------------|---------------------------------------------------------------|------------------------------------------------------------------------------------------|----------------------------------------------------------------------------------------|------|-------------------------------------------|----------------------------------|---------------------------------------------------------------------------------------------------------------------------------------------------------------------------------------------------------------------------------------------------------------------------------------------------------------------------------------------------------------------------------------------------------------------------------------------------------------------------------------------------------|
|                                                                                                                                            |                                                               |                                                                                          |                                                                                        |      |                                           |                                  | interventions post COVID pandemic.                                                                                                                                                                                                                                                                                                                                                                                                                                                                      |
| 2. <b>Abate</b> L et al. (2020). Status of distribution of coronavirus disease (COVID-19) in Ethiopia within first three months            | <i>Academic Journal of Research and Scientific Publishing</i> | Distribution of COVID-19 in Ethiopia within three months                                 | Retrospective study conducted by using secondary data extracted from FMOH daily report | NA   | COVID-19 cases                            | March 13, 2020 to June 12, 2020. | <ul style="list-style-type: none"> <li>- 2,915 cases within 3 months</li> <li>- Increment of COVID-19 from the onset of first month to the second month was 3.74% and from the second month to the third month was 84.5%.</li> <li>- Death rate increased from first two months to third month by 82.98% and the recovery rate increased by 53.44%.</li> <li>- The distribution was very high in Addis Ababa and very low in Gambella Region</li> <li>- Male were more affected than females</li> </ul> |
| 3. <b>Mengesha</b> CH et al. (2020). Confirmed COVID-19 Infected Cases in Ethiopia: A Descriptive Study                                    | <i>Preprint</i>                                               | Epidemiological characteristics of COVID-19                                              | Retrospective study conducted by using secondary data extracted from FMOH daily report | NA   | COVID-19 cases                            | March 13 to May 06, 2020.        | <ul style="list-style-type: none"> <li>- Total laboratory test during the time 26,517</li> <li>- Positive case 162 (0.61%)</li> <li>- Most cases were in young age group (20-49 years)</li> <li>- 69% of the cases were male</li> <li>- 56% were from Addis Ababa</li> <li>- 65% cases were imported cases</li> </ul>                                                                                                                                                                                   |
| 4. <b>Leulseged</b> TW et al. (2020). Characteristics and outcome profile of Hospitalized African COVID-19 patients: The Ethiopian Context | <i>Preprint</i>                                               | Characteristics and outcome of COVID-19 patients and determinants of the disease outcome | Facility based prospective cohort study                                                | 1345 | Patients admitted to COVID-19 Care Center | July to September, 2020          | <ul style="list-style-type: none"> <li>- 5.3% died, 5.4% were transferred; 1202 (89.4%) were clinically improved</li> <li>- The median time to clinical improvement was 14 days.</li> <li>- Sever COVID-19 and cough on presentation were associated with delayed clinical remission</li> <li>- Fever is associated with short disease duration</li> </ul>                                                                                                                                              |

|                                                                                                                                                           |                             |                                                       |                                            |     |                                           |                                  |                                                                                                                                                                                                                                                                                                                                                                                                                                                                                                                                                                                                                                                                                                                                 |
|-----------------------------------------------------------------------------------------------------------------------------------------------------------|-----------------------------|-------------------------------------------------------|--------------------------------------------|-----|-------------------------------------------|----------------------------------|---------------------------------------------------------------------------------------------------------------------------------------------------------------------------------------------------------------------------------------------------------------------------------------------------------------------------------------------------------------------------------------------------------------------------------------------------------------------------------------------------------------------------------------------------------------------------------------------------------------------------------------------------------------------------------------------------------------------------------|
|                                                                                                                                                           |                             |                                                       |                                            |     |                                           |                                  | <ul style="list-style-type: none"> <li>- Lower oxygen saturation, subjective complaint of shortness of breath, and being diabetic were associated with unfavorable disease outcome</li> </ul>                                                                                                                                                                                                                                                                                                                                                                                                                                                                                                                                   |
| 5. <b>Teklu S et al. (2020).</b> Clinical and Socio-demographic Profile of the First 33 COVID-19 Cases Treated at Dedicated Treatment Center in Ethiopia  | <i>Ethiop J Health Sci.</i> | Describing the first 33 cases of COVID 19 in Ethiopia | Facility-based descriptive study           | 33  | RT-PCR confirmed COVID 19 cases           | March 13, 2020 to April 03, 2020 | <ul style="list-style-type: none"> <li>- 30 of the cases were either imported or contacts of confirmed cases.</li> <li>- Median age: 36 years</li> <li>- Most frequent symptoms: cough, headache and fever</li> <li>- Rare symptoms: diarrhea, sore throats, loss of taste and/or smell sensation.</li> <li>- Severity: 84.8% were mild to moderate cases; 15.2% (n=5) were critical at the time of admission (admitted to ICU)</li> <li>- Among critical cases: four required invasive mechanical ventilation.</li> <li>- Outcome: 30 were discharged after two negative RT-PCR for SARS CoV2; three ICU cases died while on mechanical ventilator.</li> <li>- Age of the deaths: 65 years (n=2) and 60 years (n=1)</li> </ul> |
| 6. <b>Leulseged TW et al. (2020).</b> COVID-19 Disease Severity and Determinants among Ethiopian Patients: A study of the Millennium COVID-19 Care Center | <i>Preprint</i>             | Determinants of COVID-19 disease severity             | An institution-based cross-sectional study | 686 | Patients admitted to COVID-19 Care Center | June to August 2020              | <p>Factors associated with disease severity were:</p> <ul style="list-style-type: none"> <li>- Older age</li> <li>- Male sex</li> <li>- Medical conditions (Hypertension and Diabetes)</li> <li>- Symptoms (fever and headache)</li> </ul>                                                                                                                                                                                                                                                                                                                                                                                                                                                                                      |
| 7. <b>Leulseged TW et al. (2020).</b> Determinants of Developing Symptomatic Disease in Ethiopian                                                         | <i>Preprint</i>             | Determinants of having symptomatic                    | Institution based case-control study       | 765 | RT-PCR confirmed COVID 19                 | August to September 2020         | <ul style="list-style-type: none"> <li>- Only 51.37% (393) cases had symptoms on diagnosis</li> <li>- Factors associated with presence of</li> </ul>                                                                                                                                                                                                                                                                                                                                                                                                                                                                                                                                                                            |

| COVID-19 Patients                                                                                                                                                              |                 | disease among COVID-19 patients                                    |                                                |     | cases                                                    |                                | symptoms were:<br>○ Older age<br>○ Male sex<br>○ Being diabetic                                                                                                                                                                                                                                                                                                                                                                                                                                                                                    |
|--------------------------------------------------------------------------------------------------------------------------------------------------------------------------------|-----------------|--------------------------------------------------------------------|------------------------------------------------|-----|----------------------------------------------------------|--------------------------------|----------------------------------------------------------------------------------------------------------------------------------------------------------------------------------------------------------------------------------------------------------------------------------------------------------------------------------------------------------------------------------------------------------------------------------------------------------------------------------------------------------------------------------------------------|
| 8. <b>Leulseged</b> TW et al. (2020). Determinants of Time to Convalescence among COVID-19 Patients at Millennium COVID-19 Care Center in Ethiopia: A prospective cohort study | <i>Preprint</i> | Time to recovery/convalescence and determinants                    | Institution based prospective cohort           | 360 | Patients admitted to COVID-19 Care Center                | June 02, 2020 to July 05, 2020 | <ul style="list-style-type: none"> <li>- Median time to recovery/convalescence was 16 days.</li> <li>- Having moderate and severe disease, having symptoms at presentation, and presenting with respiratory and constitutional symptoms were associated with delayed time to achieve recovery.</li> <li>- Presence of symptom was found to be associated with delayed viral clearance.</li> <li>- Presence of symptoms and severe disease category were associated with delayed biochemical recovery and extended infectiousness period</li> </ul> |
| 9. <b>Leulseged</b> TW et al. (2020). Duration of Oxygen Requirement and Predictors in Severe COVID-19 Patients in Ethiopia: A Survival Analysis                               | <i>Preprint</i> | Time to getting off supplemental oxygen therapy and its predictors | Hospital based prospective observational study | 244 | Patients admitted to COVID-19 Care Center                | July to September, 2020        | <ul style="list-style-type: none"> <li>- The median time to getting off supplemental oxygen therapy was 6 days [2 to 35 days]</li> <li>- <math>\geq 70</math> years of age and having shortness of breath were found to be associated with prolonged duration of supplemental oxygen therapy requirement.</li> </ul>                                                                                                                                                                                                                               |
| 10. <b>Maru</b> EH et al. (2020). Predictors of Death in Severe COVID-19 Patients at Millennium COVID-19 Care Center in Ethiopia: A Case-Control Study                         | <i>Preprint</i> | Death in Severe COVID-19 patients                                  | Hospital-based case-control study.             | 147 | Patients admitted to COVID-19 Care Center (Severe cases) | August to September 2020       | <ul style="list-style-type: none"> <li>- 49 (33.3%) patients died and 98 were discharged</li> <li>- Diabetes and dyspnea at admission were associated with outcome of death</li> <li>- Having a fever at admission was associated with a favorable outcome</li> </ul>                                                                                                                                                                                                                                                                              |
| 11. <b>Gebremariam</b> BM et al. (2020).                                                                                                                                       | <i>Pan</i>      | Success and                                                        | Retrospectiv                                   | 263 | COVID-19                                                 | March 13                       | - Median age of COVID-19 cases                                                                                                                                                                                                                                                                                                                                                                                                                                                                                                                     |

| Epidemiological characteristics and treatment outcomes of hospitalized patients with COVID-19 in Ethiopia                               | <i>African Medical Journal</i> | gaps of COVID-19 treatments                   | review of official COVID-19 data          |                    | cases reported daily by Ethiopian Public Health Institute | to May 13, 2020      | <ul style="list-style-type: none"> <li>- was 34 years</li> <li>- 63.9% of cases were between 15 and 34 years of age.</li> <li>- 55.5% of cases were imported; about quarter of imported cases were from African countries</li> <li>- 63.5% of cases were identified through symptom based surveillance</li> <li>- Case fatality rate was 1.9%</li> <li>- Four out of five patients in ICU were deceased after 2-6 days spent in critical care.</li> </ul> |
|-----------------------------------------------------------------------------------------------------------------------------------------|--------------------------------|-----------------------------------------------|-------------------------------------------|--------------------|-----------------------------------------------------------|----------------------|-----------------------------------------------------------------------------------------------------------------------------------------------------------------------------------------------------------------------------------------------------------------------------------------------------------------------------------------------------------------------------------------------------------------------------------------------------------|
| 12. <b>Kempen</b> JH et al. (2020). SARS-CoV-2 Serosurvey in Addis Ababa, Ethiopia.                                                     | <i>ASTMH</i>                   | Seroprevalence of SARS-CoV-2 infection        | Institution-based cross-sectional         | 99                 | Community (Adults of age 14 years or older)               | May 18–21, 2020      | <ul style="list-style-type: none"> <li>- Population prevalence was 3% (1.0–8.4%).</li> <li>- Larger number of people have been infected than the counts detected by surveillance to date</li> <li>- The large majority of the general population remains susceptible to COVID-19</li> </ul>                                                                                                                                                               |
| 13. <b>Alemu</b> BN et al. (2020). Seroprevalence of anti-SARS-CoV-2 Antibodies in Addis Ababa, Ethiopia                                | <i>Preprint</i>                | Seroprevalence of SARS-CoV-2 infection        | Cross-sectional community-based study     | 301                | Community (adults)                                        | April 23 to 28, 2020 | <ul style="list-style-type: none"> <li>- Observed prevalence 7.6%</li> <li>- Adjust prevalence 8.8% (5.5%-11.6%)</li> <li>- Higher sero-prevalence were observed for Males (9.0%), age below 50 years (8.2), students and unemployed (15.6%)</li> </ul>                                                                                                                                                                                                   |
| <b>C. Mental health problems during COVID-19 in Ethiopia</b>                                                                            |                                |                                               |                                           |                    |                                                           |                      |                                                                                                                                                                                                                                                                                                                                                                                                                                                           |
| <b>Author (year). Title</b>                                                                                                             | <b>Source/ Journal</b>         | <b>Aims</b>                                   | <b>Design</b>                             | <b>Sample size</b> | <b>Participant</b>                                        | <b>Study period</b>  | <b>Key findings</b>                                                                                                                                                                                                                                                                                                                                                                                                                                       |
| 1. <b>Girma</b> A. et al. (2020). Covid-19 related stress and coping strategies among adults with chronic disease in Southwest Ethiopia | <i>Preprint</i>                | COVID-19 related stress and coping strategies | Institutional based cross-sectional study | 613                | Patients visiting hospital                                | March 10 to 30, 2020 | <ul style="list-style-type: none"> <li>- The magnitude of perceived stress were 41.6%</li> <li>- Significant numbers of participants (13.9%) were suffering from severe perceived stress due to covid-19</li> </ul>                                                                                                                                                                                                                                       |

|                                                                                                                                                                                                                          |                                                                |                                                                     |                                           |     |                                                          |                                |                                                                                                                                                                                                                                                                                                                                                                                                                                                               |
|--------------------------------------------------------------------------------------------------------------------------------------------------------------------------------------------------------------------------|----------------------------------------------------------------|---------------------------------------------------------------------|-------------------------------------------|-----|----------------------------------------------------------|--------------------------------|---------------------------------------------------------------------------------------------------------------------------------------------------------------------------------------------------------------------------------------------------------------------------------------------------------------------------------------------------------------------------------------------------------------------------------------------------------------|
|                                                                                                                                                                                                                          |                                                                |                                                                     |                                           |     |                                                          |                                | outbreak                                                                                                                                                                                                                                                                                                                                                                                                                                                      |
| 2. <b>Jemal K et al. (2020).</b> COVID-19 pandemic and self-reported symptoms of depression, anxiety, and stress among health care workers in Ethiopia                                                                   | <i>Preprint</i>                                                | Level of self-reporting symptoms of depression, anxiety, and stress | Institutional-based cross-sectional study | 816 | Healthcare workers                                       | June 25, 2020 to July 25, 2020 | <ul style="list-style-type: none"> <li>- Healthcare workers had reported a high prevalence of depression, anxiety, and stress symptoms <ul style="list-style-type: none"> <li>o 78.4% positive for depression</li> <li>o 81.9% reported anxiety</li> <li>o 33.8% had reported stress</li> </ul> </li> <li>- Female sex, being a laboratory professional, and working in COVID-19 treatment center associated with depression, anxiety, and stress.</li> </ul> |
| 3. <b>Kassaw C. (2020).</b> The Psychological Impact of COVID-19 Pandemic among Communities Living in Dilla Town, Ethiopia, April 2020                                                                                   | <i>Preprint</i>                                                | Magnitude of psychological problems and their associated factor     | Community-based cross-sectional study     | 445 | Community                                                | Apr 1- Apr 15, 2020            | <ul style="list-style-type: none"> <li>- 34.4% had a psychological problem (11.4 % mild and 23% moderate level of the psychological problem).</li> <li>- Female sex, low income (&lt;500 ETB), large family size, literacy above primary school and wearing mask were associated with psychological stress</li> </ul>                                                                                                                                         |
| 4. <b>Kassaw C. (2020).</b> The Magnitude of Psychological Problem and Associated Factor in Response to COVID-19 Pandemic Among Communities Living in Addis Ababa, Ethiopia, March 2020: A Cross-Sectional Study Design. | <i>Psychology Research and Behavior Management, Dove press</i> | Magnitude of psychological problems and associated factors          | Community-based cross-sectional study     | 420 | Community 9 (social media - Facebook and telegram users) | March 10 to 30, 2020.          | <ul style="list-style-type: none"> <li>- The magnitude of moderate to severe psychological problem was 66.4%. <ul style="list-style-type: none"> <li>o 36% had anxiety, 12.4% depression, and 18% stress</li> </ul> </li> <li>- Female sex, above the secondary level of education, monthly income below 3000 ETB, and more than three family size were associated with psychological problems.</li> </ul>                                                    |
| 5. <b>Chekole YA et al. (2020).</b> Perceived Stress and Its Associated Factors during COVID-19 among Healthcare Providers in Ethiopia: A Cross-Sectional Study                                                          | <i>Advances in Public Health, Hindawi</i>                      | Prevalence of perceived stress and risk factors of COVID-19         | Institution-based cross-sectional study   | 244 | Healthcare workers                                       | March to April 2020            | <ul style="list-style-type: none"> <li>- The prevalence of perceived stress on COVID-19 was 51.6%</li> <li>- Age range of 25–31 years, being a nurse, and being pharmacist were associated with perceived stress on</li> </ul>                                                                                                                                                                                                                                |

|                                                                                                                                                                   |                                         |                                                                             |                                       |                    |                                                                           |                                | COVID-19                                                                                                                                                                                                                                                                                                                                                                                                                       |
|-------------------------------------------------------------------------------------------------------------------------------------------------------------------|-----------------------------------------|-----------------------------------------------------------------------------|---------------------------------------|--------------------|---------------------------------------------------------------------------|--------------------------------|--------------------------------------------------------------------------------------------------------------------------------------------------------------------------------------------------------------------------------------------------------------------------------------------------------------------------------------------------------------------------------------------------------------------------------|
| 6. <b>Ambelu A et al. (2020).</b><br>Psychological Distress During the COVID-19 Pandemic in Ethiopia: The Need for Equal Attention of Intervention                | <i>Preprint</i>                         | Prevalence of psychological distress and associated factors during COVID-19 | Web-based cross-sectional study       | 929                | Community (Literate Ethiopian population who have access to the internet) | April 22 to May 4 2020         | <ul style="list-style-type: none"> <li>- The prevalence of high psychological distress was 25.5%</li> <li>- Individuals who get information from social media, younger age (&lt;50 years), those who don't wash hands, were more likely to have psychological distress</li> </ul>                                                                                                                                              |
| 7. <b>Tadesse AW et al. (2020).</b><br>Psychological Impacts of COVID-19 among College Students in Dessie Town, Amhara Region, Ethiopia: Cross-sectional Study    | <i>Preprint</i>                         | Psychological impact of COVID-19 upon students                              | Community-based cross-sectional study | 408                | College students                                                          | April 15-May 15, 2020          | <ul style="list-style-type: none"> <li>- The overall psychological effect of COVID-19 among college students was 16.2% (anxiety, depression, and stress all together) <ul style="list-style-type: none"> <li>o 77.2% - depression</li> <li>o 71.8% anxiety</li> <li>o 48.5% stress d/o</li> </ul> </li> <li>- Being rural resident, female sex, inadequate IPC practices were associated with psychological impact.</li> </ul> |
| 8. <b>Kassaw C et al. (2020).</b> The Current Mental Health Crisis of COVID-19 Pandemic among Communities Living in Gedeo Zone Dilla, SNNP, Ethiopia, April 2020. | <i>J Psychosoc Rehabil Ment Health.</i> | Current mental health crisis of the COVID-19 pandemic                       | Community-based cross-sectional study | 420                | Community                                                                 | March 10, 2020 to Apr 10, 2020 | <ul style="list-style-type: none"> <li>- 44.4% of the respondents reported mild to moderate psychological problem</li> <li>- Being female, income &lt;300ETB, and large family size (&gt;3) were associated with psychological problems</li> </ul>                                                                                                                                                                             |
| <b>D. Preparedness for COVID-19 control in Ethiopia</b>                                                                                                           |                                         |                                                                             |                                       |                    |                                                                           |                                |                                                                                                                                                                                                                                                                                                                                                                                                                                |
| <b>Author (year). Title</b>                                                                                                                                       | <b>Source/ Journal</b>                  | <b>Aims</b>                                                                 | <b>Design</b>                         | <b>Sample size</b> | <b>Participant</b>                                                        | <b>Study period</b>            | <b>Key findings</b>                                                                                                                                                                                                                                                                                                                                                                                                            |



|                                                                                                                                                                                                       |                                     |                                                                         |                                      |      |                    |                            |                                                                                                                                                                                                                                                                                                                                                                                                                                                                                                         |
|-------------------------------------------------------------------------------------------------------------------------------------------------------------------------------------------------------|-------------------------------------|-------------------------------------------------------------------------|--------------------------------------|------|--------------------|----------------------------|---------------------------------------------------------------------------------------------------------------------------------------------------------------------------------------------------------------------------------------------------------------------------------------------------------------------------------------------------------------------------------------------------------------------------------------------------------------------------------------------------------|
| 1. <b>Edae</b> CK et al. (2020). Assessment of Preparedness and Response of Health Professionals Towards COVID-19 Pandemic during Early Period in Public Hospitals in Oromia Regional State, Ethiopia | <i>Preprint</i>                     | Healthcare professionals' preparedness and response to COVID 19         | Web-based cross-sectional study      | 340  | Healthcare workers | April 01 to April 30, 2020 | Healthcare professionals in the region were not prepared for COVID-19 pandemic: <ul style="list-style-type: none"> <li>- Lack of sufficient information</li> <li>- Lack of scientific evidence at hand</li> <li>- Unable to access WHO and FMOH guidelines and recommendations</li> <li>- Limited access to literature</li> <li>- Low local support</li> <li>- Poor communication and collaboration between stakeholders</li> <li>- Lack of training</li> <li>- Busy with routine activities</li> </ul> |
| 2. <b>Deressa</b> W et al. (2020). Availability of personal protective equipment and satisfaction of healthcare professionals during COVID-19 pandemic in Ethiopia                                    | <i>Preprint</i>                     | Self-reported availability and use of PPE as well as satisfaction level | Hospital-based cross-sectional study | 1134 | Healthcare workers | June 09-26, 2020.          | <ul style="list-style-type: none"> <li>- Gloves and gowns were reported as the most frequently available PPE in the routine care of patients before and during the pandemic.</li> <li>- During the COVID-19 pandemic, availability of most PPEs (e.g., surgical facemask and N95 respirator) has improved</li> <li>- There was critical shortage of appropriate PPE both before and during COVID-19.</li> <li>- 54.7% of the participants were unsatisfied with availability of PPE</li> </ul>          |
| 3. <b>Kasahun</b> GG et al. (2020). Pharmacy preparedness and response for the prevention and control of coronavirus disease (COVID-19) in Aksum, Ethiopia; a qualitative exploration                 | <i>BMC Health Services Research</i> | Pharmacy preparedness and response to prevent and control COVID-19      | Qualitative study                    | NA   | Pharmacies (n=6)   | May 2020                   | <ul style="list-style-type: none"> <li>- Necessary pharmacy services were being given</li> <li>- Sufficient supplies of drugs and medical supplies were scarce</li> </ul>                                                                                                                                                                                                                                                                                                                               |

|                                                                                                                                                                                    |                                                  |                                                                    |                                                      |     |                              |                          |                                                                                                                                                                                                                                                                                                                                                                                                                                                                                     |
|------------------------------------------------------------------------------------------------------------------------------------------------------------------------------------|--------------------------------------------------|--------------------------------------------------------------------|------------------------------------------------------|-----|------------------------------|--------------------------|-------------------------------------------------------------------------------------------------------------------------------------------------------------------------------------------------------------------------------------------------------------------------------------------------------------------------------------------------------------------------------------------------------------------------------------------------------------------------------------|
| 4. <b>Ambie</b> MB et al. (2020). Preparedness and Approaches of Health Care Providers to Tackle the Transmission of COVID-19 among South Gondar Zone Hospitals, Amhara, Ethiopia. | <i>Preprint</i>                                  | Preparedness and approaches to tackle the transmission of covid-19 | Institutional-based cross-sectional study            | 422 | Healthcare workers           | May to June 2020         | <ul style="list-style-type: none"> <li>- Healthcare workers did not have adequate psychological preparedness</li> <li>- Healthcare systems were not ready in terms of supplies and materials needed for infection prevention.</li> </ul>                                                                                                                                                                                                                                            |
| 5. <b>Mulu</b> GB et al. (2020). Preparedness and responses of Healthcare Providers to Tackle the Transmission of Covid-19 among North Shewa Zone Hospitals, Amhara, Ethiopia.     | <i>Infection and Drug Resistance, Dove press</i> | Preparedness and responses to combat the spread of COVID-19        | Facility-based cross-sectional study                 | 404 | Healthcare workers           | April to May 2020        | <ul style="list-style-type: none"> <li>- 74.5% of study participants felt unsafe in their workplace</li> <li>- 64.4% of them responded that they feel anxious while working with febrile patients.</li> <li>- Access for important PPE was found to be low: <ul style="list-style-type: none"> <li>o Gloves – 31%</li> <li>o Facemask – 27.4%</li> <li>o Goggle – 15.9%</li> <li>o Shoe – 14.5%</li> <li>o Apron – 14.2%</li> </ul> </li> </ul>                                     |
| 6. <b>Addis</b> Y et al. (2020). Social work responses and household-level determinants of coronavirus preparedness in rural Ethiopia                                              | <i>Preprint</i>                                  | Understanding and preparedness to confront COVID-19                | Community based – qualitative and quantitative study | 190 | Community (rural households) | April 20 to May 30, 2020 | <ul style="list-style-type: none"> <li>- 46% made preparedness to respond to the pandemic.</li> <li>- 38.4% understood the nature of the pandemic</li> <li>- 34.2% knew signs and symptoms</li> <li>- 20.9% practiced prevention</li> <li>- Rural households recognized little about COVID 19 and in response, a few community groups, which consist of youth and university students, religious leaders, and elders were engaged to reduce the consequence of COVID 19.</li> </ul> |

#### **E. Impact of COVID-19 on essential healthcare in Ethiopia**

| <b>Author (year). Title</b>                                                | <b>Source/ Journal</b> | <b>Aims</b>           | <b>Design</b>       | <b>Sample size</b> | <b>Participant</b> | <b>Study period</b> | <b>Key findings</b>                                                                                             |
|----------------------------------------------------------------------------|------------------------|-----------------------|---------------------|--------------------|--------------------|---------------------|-----------------------------------------------------------------------------------------------------------------|
| 1. <b>Ketema</b> B et al. (2020). Challenges and coping strategies in non- | <i>Preprint</i>        | challenges and coping | One-to-one in-depth | 22                 | Healthcare workers | April 20 to May     | <ul style="list-style-type: none"> <li>- The flow of NCD patients to healthcare facilities decreased</li> </ul> |

|                                                                                                                                                                                     |                                                  |                                                                           |                                                               |    |                                                  |                                     |                                                                                                                                                                                                                                                                                                                                                                                                                                                                                                                                                                                                                                                                                    |
|-------------------------------------------------------------------------------------------------------------------------------------------------------------------------------------|--------------------------------------------------|---------------------------------------------------------------------------|---------------------------------------------------------------|----|--------------------------------------------------|-------------------------------------|------------------------------------------------------------------------------------------------------------------------------------------------------------------------------------------------------------------------------------------------------------------------------------------------------------------------------------------------------------------------------------------------------------------------------------------------------------------------------------------------------------------------------------------------------------------------------------------------------------------------------------------------------------------------------------|
| communicable disease management during COVID-19 in Addis Ababa, Ethiopia: A qualitative study                                                                                       |                                                  | strategies in non-communicable chronic disease management during COVID-19 | interview via telephone                                       |    | caring for NCD (n=13) and people with NCDs (n=9) | 20, 2020                            | during COVID-19 because of: <ul style="list-style-type: none"> <li>○ Fear of acquiring COVID-19 infection</li> <li>○ Transportation problems</li> <li>- NCD related problems during COVID-19: <ul style="list-style-type: none"> <li>○ Decrease in physical activity and weight gain</li> <li>○ Stress</li> </ul> </li> </ul>                                                                                                                                                                                                                                                                                                                                                      |
| 2. <b>Tolu LB</b> et al. (2020). Effect of COVID-19 pandemic on safe abortion and contraceptive services and mitigation measures: A case study from a tertiary facility in Ethiopia | <i>Ethiopia n Journal of Reproductive Health</i> | Impact of COVID-19 on contraception and safe abortion care services       | Comparative case study (March – May 2020 Vs March – May 2019) | NA | Healthcare facility                              | March to May 2020                   | <p><b>Reduction in delivery services:</b></p> <ul style="list-style-type: none"> <li>- Delivery decreased by 27.6%</li> <li>- Immediate postpartum family planning decreased by 66.7%</li> </ul> <p><b>Reduction in abortion care:</b></p> <ul style="list-style-type: none"> <li>- Safe abortion decreased by 16.4%</li> <li>- Post-abortion care services reduced by 20.31%</li> </ul> <p><b>All methods of contraception decreased:</b></p> <ul style="list-style-type: none"> <li>- Overall number of clients presenting for family planning was reduced by 27%.</li> <li>- Tubal ligation decreased by 85.7%</li> <li>- IUCD by 63.4%</li> <li>- Implants by 40.3%</li> </ul> |
| 3. <b>Abdela SG</b> et al. (2020). Essential Healthcare Services in the Face of COVID-19 Prevention: Experiences from a Referral Hospital in Ethiopia.                              | <i>Am J Trop Med Hyg.</i>                        | Effect of prevention measures on essential healthcare services            | Retrospective review of client registry                       | NA | Healthcare facility                              | February 24, 2020 to April 19, 2020 | During the implementation of COVID-19 prevention measures, patient flow decreased in all elements of essential healthcare service: <ul style="list-style-type: none"> <li>- Family planning (98%)</li> <li>- Emergency surgery (77%)</li> <li>- Follow-up of chronic surgical conditions (70%)</li> <li>- ANC follow-up (&gt;50%)</li> <li>- Neonatal admission and other</li> </ul>                                                                                                                                                                                                                                                                                               |

|                                                                                                                                                                                                |                 |                                                                     |                                                                                                                |     |                                                                            |                    |                                                                                                                                                                                                                                                                                                                                                                                                                                                                                                                                                                                                                                                                                                                                                                                                                                                                               |
|------------------------------------------------------------------------------------------------------------------------------------------------------------------------------------------------|-----------------|---------------------------------------------------------------------|----------------------------------------------------------------------------------------------------------------|-----|----------------------------------------------------------------------------|--------------------|-------------------------------------------------------------------------------------------------------------------------------------------------------------------------------------------------------------------------------------------------------------------------------------------------------------------------------------------------------------------------------------------------------------------------------------------------------------------------------------------------------------------------------------------------------------------------------------------------------------------------------------------------------------------------------------------------------------------------------------------------------------------------------------------------------------------------------------------------------------------------------|
|                                                                                                                                                                                                |                 |                                                                     |                                                                                                                |     |                                                                            |                    | childhood emergency visits (>70%)<br>- The number of surgical and medical emergency visits (>50%)                                                                                                                                                                                                                                                                                                                                                                                                                                                                                                                                                                                                                                                                                                                                                                             |
| 4. <b>Temesgen K et al. (2020).</b> Maternal health care services utilization in the amid of COVID-19 pandemic in West Shoa Zone, Central Ethiopia                                             | <i>Preprint</i> | Maternal health care services during COVID-19 pandemic              | Community-based cross-sectional study                                                                          | 844 | Pregnant women                                                             | July 1 to 30, 2020 | Maternal health service utilization during the COVID-19 pandemic was 64.8% (less than national average)<br>Reasons:<br>- Fear of getting COVID-19<br>- Service interruption<br>- Movement was limited                                                                                                                                                                                                                                                                                                                                                                                                                                                                                                                                                                                                                                                                         |
| 5. <b>Temesgen K et al. (2020).</b> The impact of COVID-19 infection on maternal and reproductive health care services in governmental health institutions of Dessie town, North-East Ethiopia | <i>Preprint</i> | Impact of COVID-19 on maternal and reproductive healthcare services | Institution based cross sectional study design using mixed (quantitative supplemented with qualitative) method | 422 | Mothers getting service in governmental health institutions of Dessie town | July 1-15 / 2020.  | Negative impact on maternal and reproductive healthcare services<br>- 6% of antenatal care attendees, 18% of delivery care attendees and 46.7% of postnatal care attendees reported inappropriate service delivery due to fear of health care providers, shortage medical supplies and staff work load.<br>- 32% of ANC attendees, 35.3% of delivery care attendees and 37.4% of postnatal care attendees reported that the support they received from the health care provider was worsened due to COVID-19.<br>- 33.5% of ANC attendants reported cancellation of regular ANC visits.<br>- 85.3% of participants was stressed due to corona and health concern was the greatest source of stress which accounts 42%.<br>- 93.3% reported that COVID-19 has negative impact on their life, of which nearly one-third (29.3%) of them stated it as extremely negative impact. |

|                                                                                                                                                                                            |                      |                                                                          |                                       |     |                                    |                    |                                                                                                                                                                                                                                                                                                                                                                      |
|--------------------------------------------------------------------------------------------------------------------------------------------------------------------------------------------|----------------------|--------------------------------------------------------------------------|---------------------------------------|-----|------------------------------------|--------------------|----------------------------------------------------------------------------------------------------------------------------------------------------------------------------------------------------------------------------------------------------------------------------------------------------------------------------------------------------------------------|
|                                                                                                                                                                                            |                      |                                                                          |                                       |     |                                    |                    | - Women reported unwanted pregnancy after corona outbreak; 63.6% of them mentioned unavailability of family planning services as a reason                                                                                                                                                                                                                            |
| 6. <b>Yigezu A et al. (2020).</b> The Indirect Impact of the COVID-19 Pandemic on Maternal and Child Mortality in Ethiopia: Modelling Study                                                | <i>Preprint</i>      | Indirect impact of COVID-19 pandemic on maternal and child mortality     | Modeling                              | NA  | NA                                 |                    | A significant number of additional maternal and child deaths would occur in Ethiopia if the essential health service interruption persists, as seen in the first few months of the pandemic.<br>- 10,252 to 41,945 child deaths<br>- 379 to 4,038 maternal deaths<br>- 1,673 to 13,294 stillbirths<br>This is more than the mortality caused by the pandemic itself. |
| <b>F. Violence against women during COVID-19 lockdown in Ethiopia</b>                                                                                                                      |                      |                                                                          |                                       |     |                                    |                    |                                                                                                                                                                                                                                                                                                                                                                      |
| 1. <b>Gebrewahd GT et al. (2020).</b> Intimate partner violence against reproductive age women during COVID-19 pandemic in northern Ethiopia 2020: a community-based cross-sectional study | <i>Reprod Health</i> | Intimate partner violence against reproductive age women during COVID-19 | Community-based cross-sectional study | 682 | Community (reproductive age women) | April to May, 2020 | The prevalence of intimate partner violence 24.6%<br>- 13.3% psychological violence<br>- 8.3% physical<br>- 5.3% sexual violence<br>Housewives, younger women (< 30), women with arrange marriage, and women with husband's age being "between" 31–40 were more likely to suffer from violence                                                                       |

**Annex – III: Articles excluded following full text review** [Reasons for exclusion (1) not original research article, (2) not related to health/COVID-19, and (3) methodological issues]

1. Abebe Y, Beshir IA, Tsegaye ZT et al. Health System Adaptability at Primary Level Care in the Time of COVID-19: Experiences From Ethiopia, 09 October 2020, PREPRINT (Version 1) available at Research Square: <https://doi.org/10.21203/rs.3.rs-88250/v1>
2. Alemneh HT, Tilahun GT. Mathematical Modeling and Optimal Control Analysis of COVID-19 in Ethiopia. medRxiv 2020: 2020.07.23.20160473.
3. Argawu AS. Linear Regression Model for Predictions of COVID-19 New Cases and New Deaths Based on May/June Data in Ethiopia, 19 August 2020, PREPRINT (Version 1) available at Research Square: <https://doi.org/10.21203/rs.3.rs-61667/v1>
4. Balcha A. Curve Fitting and Least Square Analysis to Extrapolate for the Case of COVID-19 Status in Ethiopia. *Advances in Infectious Diseases*. 2020; 10: 143-159. doi: 10.4236/aid.2020.103015.
5. Baye K. COVID-19 prevention measures in Ethiopia: Current realities and prospects. ESSP Working Paper 141. Washington, DC; Addis Ababa, Ethiopia: International Food Policy Research Institute (IFPRI); Federal Democratic Republic of Ethiopia Policy Studies Institute. 2020: <https://doi.org/10.2499/p15738coll2.133729>
6. Begna F. Dugassa. What can we Learn from the Past Deadly Pandemics and Prepare to Curb COVID-19? The Case in Oromia Regional State in Ethiopia. *American Journal of Public Health Research*. 2020; 8(2):67-76. doi: 10.12691/ajphr-8-2-5
7. Belay E.G. et al. Towards Curtailing Infodemic in the Era of COVID-19: A Contextualized Solution for Ethiopia. In: Stephanidis C. et al. (eds) HCI International 2020 – Late Breaking Papers: Interaction, Knowledge and Social Media. HCII 2020. Lecture Notes in Computer Science, vol 12427. Springer, Cham: [https://doi.org/10.1007/978-3-030-60152-2\\_17](https://doi.org/10.1007/978-3-030-60152-2_17)
8. Belete YM. Uncovering the Effects of COVID-19 Responses on the Lives of Commercial Sex Workers: A Phenomenological Study in Bahir Dar City Administration, Ethiopia, 18 August 2020, PREPRINT (Version 1) available at Research Square: <https://doi.org/10.21203/rs.3.rs-39483/v1>
9. Deressa CT, Duressa GF. Modeling and optimal control analysis of transmission dynamics of COVID-19: The case of Ethiopia. *Alexandria Engineering Journal* 2021; 60(1): 719-32.
10. Getaneh Y, Yizengaw A, Adane S, et al. Global lessons and Potential strategies in combating COVID-19 pandemic in Ethiopia: Systematic Review. medRxiv 2020: 2020.05.23.20111062.
11. Goshu D, Ketema M, Diriba G, Ferede T. Assessment of COVID-19 Effects and Response Measures in Ethiopia: Livelihoods and Welfare Implications. Policy Working Paper 04/2020. Ethiopian Economic Policy Research Institute (EEPRI). <https://doi.org/10.2147/RMHP.S258273>
12. Kanno GG, Lagiso ZA, Abate ZG, et al. Is Rainwater Harvesting Sufficient to Satisfy The Emergency Water Demand for The Prevention of COVID-19? The Case of Dilla town, Southern, Ethiopia. Preprints.org; 2020. DOI: 10.20944/preprints202008.0721.v2.
13. Kassu A, Yimer G, Benor S, Tesfaye K, Tefera Y, Admassu M et al. Multi-Disciplinary COVID-19 Research Prioritization in Low-Resource Settings: The Ethiopia Model (5/20/2020). Available at SSRN: <https://ssrn.com/abstract=3608055> or <http://dx.doi.org/10.2139/ssrn.3608055>
14. Lee H, Moon SJ, Ndombi GO, Kim KN, Berhe H, Nam EW. COVID-19 Perception, Knowledge, and Preventive Practice: Comparison between South Korea, Ethiopia, and Democratic Republic of Congo. *Afr J Reprod Health*. 2020 Jun;24(s1):66-77. doi: 10.29063/ajrh2020/v24i2s.11.
15. Lobie TA, Tesfaye D, Abrham A. A narrative synthesis on COVID-19 risks and concerns in developing countries: The case of Ethiopia. *Journal of Public Health and Epidemiology*. 2020; 12(2): 86-97.

16. Misganaw CD. Corona Virus Disease 2019 (COVID-19) Pandemic Up-to-Date Facts, Opportunities and Challenges: A review on Cases in Ethiopia. Preprints 2020, 2020050410 (doi: 10.20944/preprints202005.0410.v1).
17. Nuredin Nassir Azmach, Tesfay Gebremariam Tesfahannes, Samiya Abrar Abdulsemed et al. Prospective Time Periodic Geographical Covid-19 Surveillance in Ethiopia Using a Space-time Scan Statistics: Detecting and Evaluating Emerging Clusters, 18 September 2020, PREPRINT (Version 1) available at Research Square: <https://doi.org/10.21203/rs.3.rs-76052/v1>
18. Terefe B, Rovetta A, Rajan AK, Awoke M. Coronavirus-related online web search desire amidst the rising novel coronavirus incidence in Ethiopia: Google Trends-based infodemiology. medRxiv 2020: 2020.07.23.20158592.
19. Tiruneh D, Baye G, Dubi Y. A Critical Discourse Analysis of COVID-19 in Ethiopia: Rethinking the Past and Defining the Present. *Journal of Language and Literature*, 20(2), 318. doi:<https://doi.org/10.24071/joll.v20i2.2608>
20. Tolu LB, Ezeh A, Feyissa GT. How Prepared Is Africa for the COVID-19 Pandemic Response? The Case of Ethiopia. *Risk Manag Healthc Policy*. 2020;13:771-776:
21. Tulu TW, Leong IT, Wu Z. Modeling and Predicting Corona Contagion Dynamics in China, USA, Brazil & Ethiopia, *Science Journal of Applied Mathematics and Statistics*. Vol. 8, No. 5, 2020, pp. 67-72. doi: 10.11648/j.sjams.20200805.13
22. Wondimu Gudu, Mekitie Wondafrash, Delayehu Bekele et al. The Impact of COVID-19 pandemic on Obstetrics and Gynecology Residency Programs and perspectives on adaptive ways of training in Ethiopia, 17 June 2020, PREPRINT (Version 1) available at Research Square: <https://doi.org/10.21203/rs.3.rs-35772/v1>
23. Wondmkun YT, Mohammed OA (2020) Severe Acute Respiratory Syndrome-Coronavirus-2 (SARS-COV-2) Inhibition and other Antiviral Effects of Ethiopian Medicinal Plants and their Compounds. *J In Silico In Vitro Pharmacol* Vol.6 No.2:4.
24. Yedemie YY. Mental Health and Psychosocial Aspects of Corona Virus Disease (COVID-19) Outbreak in Ethiopia: Psychological Intervention for Public Psychological Crisis. *International Journal of Psychological and Brain Sciences*. Vol. 5, No. 4, 2020, pp. 56-60. doi: 10.11648/j.ijpbs.20200504.11
